# Supplementary material
Source: publisher figshare collection journal article supplement (https://gsapubs.figshare.com/articles/dataset/_/12534491)
Supplement: Supplementary file 1 [file 1]

## Sheet: DFS16-opx7
Table DR6. The measured water content profile for DFS opx and their 1D or 3D modeling results.
3D modeling						Measured profiles
L-R profile	3D modeling		C-D profile	3D modeling		L-R profile	Measured	error (5%)	C-D profile	Measured	error (5%)
Distance(mm)	0.2yr	0.5yr	Distance(mm)	0.2yr	0.5yr	Distance(mm)			Distance(mm)
0	20	20	0	20	20	0.25	60	3	0
0.021	23.7116	22.6892	0.024	24.3163	22.9168	0.3	67	3.35	0.05
0.041	27.4109	25.3747	0.048	28.6129	25.8282	0.35	69	3.45	0.1
0.062	31.0856	28.0527	0.072	32.8705	28.7289	0.4	74	3.7	0.15
0.082	34.7238	30.7198	0.096	37.0702	31.6138	0.45	77	3.85	0.2
0.103	38.3139	33.3721	0.12	41.1939	34.4775	0.5	82	4.1	0.25
0.123	41.8446	36.0062	0.144	45.2246	37.3152	0.55	85	4.25	0.3	70.8774	3.54387
0.143	45.3055	38.6185	0.168	49.1463	40.1217	0.6	88	4.4	0.35	72.5033	3.62516
0.164	48.6867	41.2056	0.192	52.9448	42.8924	0.65	91	4.55
0.185	51.9789	43.7642	0.216	56.607	45.6227	0.7	93	4.65	0.45	79.5204	3.97602
0.205	55.1739	46.291	0.24	60.1219	48.3082	0.75	94	4.7	0.5	89.1835	4.45917
0.226	58.2643	48.7828	0.264	63.4799	50.9449	0.8	96	4.8	0.55	87.8107	4.39053
0.246	61.2435	51.2366	0.288	66.6734	53.5287	0.85	97	4.85	0.6	89.4749	4.47374
0.267	64.1059	53.6495	0.312	69.6968	56.056	0.9	98	4.9	0.65	85.5023	4.27512
0.287	66.8471	56.0188	0.336	72.546	58.5236	0.95	99	4.95	0.7	85.4333	4.27166
0.307	69.4634	58.3418	0.36	75.2188	60.9282	1	98	4.9	0.75	94.7819	4.73909
0.328	71.9521	60.6159	0.384	77.7147	63.2672	1.05	100	5	0.8	92.1437	4.60719
0.349	74.3118	62.8389	0.408	80.0348	65.5379	1.1	99	4.95	0.85	89.2448	4.46224
0.369	76.5415	65.0086	0.432	82.1817	67.7383	1.15	101	5.05	0.9	94.9659	4.7483
0.389	78.6414	67.1228	0.456	84.1593	69.8664	1.2	100	5	0.95	92.113	4.60565
0.41	80.6126	69.1797	0.48	85.9726	71.9206	1.25	100	5	1	91.9827	4.59913
0.431	82.4567	71.1776	0.504	87.6277	73.8996	1.3	100	5	1.05	97.4354	4.87177
0.451	84.1762	73.1148	0.528	89.1315	75.8024	1.35	100	5	1.1	92.5579	4.62789
0.472	85.7741	74.9899	0.552	90.4917	77.6283	1.4	101	5.05	1.15	99.5827	4.97914
0.492	87.2542	76.8016	0.576	91.7162	79.3767	1.45	99	4.95	1.2	102.765	5.13827
0.513	88.6205	78.5488	0.6	92.8137	81.0475	1.501	100	5	1.25	95.2344	4.76172
0.533	89.8775	80.2304	0.624	93.7929	82.6406	1.551	98	4.9	1.3	91.4228	4.57114
0.553	91.0301	81.8456	0.648	94.6625	84.1564	1.601	97	4.85	1.35	98.394	4.9197
0.574	92.0834	83.3935	0.672	95.4312	85.5952	1.651	96	4.8	1.4	94.13	4.7065
0.594	93.0428	84.8736	0.696	96.1077	86.9577	1.701	96	4.8	1.45	100.787	5.03934
0.615	93.9135	86.2853	0.72	96.7003	88.2447	1.751	93	4.65	1.5	89.3522	4.46761
0.636	94.7011	87.6283	0.744	97.217	89.4572	1.801	92	4.6	1.55	92.4811	4.62406
0.656	95.411	88.9022	0.768	97.6655	90.5963	1.851	89	4.45	1.6	92.1744	4.60872
0.677	96.0486	90.1067	0.792	98.0531	91.6631	1.901	88	4.4	1.65	91.7526	4.58763
0.697	96.6192	91.2417	0.816	98.3863	92.6589	1.951	84	4.2	1.7	97.7881	4.88941
0.718	97.1279	92.3072	0.84	98.6716	93.5851	2.001	82	4.1	1.75	70.5016	3.52508
0.738	97.5795	93.303	0.864	98.9146	94.443	2.051	79	3.95	1.8	76.844	3.8422
0.759	97.9789	94.2294	0.888	99.1207	95.2341	2.101	74	3.7	1.85	66.9969	3.34984
0.779	98.3303	95.0862	0.912	99.2945	95.9597	2.151	69	3.45	1.9	70.0108	3.50054
0.799	98.6381	95.8736	0.936	99.4404	96.6213	2.201	63	3.15	1.95	63.0166	3.15083
0.82	98.906	96.5919	0.96	99.5621	97.2201
0.84	99.1376	97.241	0.984	99.6629	97.7576
0.861	99.3361	97.8212	1.008	99.746	98.2349
0.882	99.5044	98.3327	1.032	99.8137	98.6531
0.902	99.6451	98.7756	1.056	99.8683	99.0134
0.923	99.7604	99.15	1.08	99.9115	99.3166
0.943	99.8522	99.4562	1.104	99.9449	99.5636
0.964	99.922	99.6942	1.128	99.9697	99.7549
0.984	99.971	99.8641	1.152	99.9867	99.8912
1.005	100	99.966	1.176	99.9967	99.9728
1.025	100.01	100	1.2	100	100
1.046	100	99.966	1.224	99.9967	99.9728
1.066	99.971	99.8641	1.248	99.9867	99.8912
1.087	99.922	99.6942	1.272	99.9697	99.7549
1.107	99.8522	99.4562	1.296	99.9449	99.5636
1.128	99.7604	99.15	1.32	99.9115	99.3166
1.148	99.6451	98.7756	1.344	99.8683	99.0134
1.169	99.5044	98.3327	1.368	99.8137	98.6531
1.189	99.3361	97.8212	1.392	99.746	98.2349
1.21	99.1376	97.241	1.416	99.6629	97.7576
1.23	98.906	96.5919	1.44	99.5621	97.2201
1.251	98.6381	95.8736	1.464	99.4404	96.6213
1.271	98.3303	95.0862	1.488	99.2945	95.9597
1.292	97.9789	94.2294	1.512	99.1207	95.2341
1.312	97.5795	93.303	1.536	98.9146	94.443
1.332	97.1279	92.3072	1.56	98.6716	93.5851
1.353	96.6192	91.2417	1.584	98.3863	92.6589
1.373	96.0486	90.1067	1.608	98.0531	91.6631
1.394	95.411	88.9022	1.632	97.6655	90.5963
1.415	94.7011	87.6283	1.656	97.217	89.4572
1.435	93.9135	86.2853	1.68	96.7003	88.2447
1.456	93.0428	84.8736	1.704	96.1077	86.9577
1.476	92.0834	83.3935	1.728	95.4312	85.5952
1.497	91.0301	81.8456	1.752	94.6625	84.1564
1.517	89.8775	80.2304	1.776	93.7929	82.6406
1.538	88.6205	78.5488	1.8	92.8137	81.0475
1.558	87.2542	76.8016	1.824	91.7162	79.3767
1.579	85.7741	74.9899	1.848	90.4917	77.6283
1.599	84.1762	73.1148	1.872	89.1315	75.8024
1.62	82.4567	71.1776	1.896	87.6277	73.8996
1.64	80.6126	69.1797	1.92	85.9726	71.9206
1.661	78.6414	67.1228	1.944	84.1593	69.8664
1.681	76.5415	65.0086	1.968	82.1817	67.7383
1.702	74.3118	62.8389	1.992	80.0348	65.5379
1.722	71.9521	60.6159	2.016	77.7147	63.2672
1.743	69.4634	58.3418	2.04	75.2188	60.9282
1.763	66.8471	56.0188	2.064	72.546	58.5236
1.783	64.1059	53.6495	2.088	69.6968	56.056
1.804	61.2435	51.2366	2.112	66.6734	53.5287
1.824	58.2643	48.7828	2.136	63.4799	50.9449
1.845	55.1739	46.291	2.16	60.1219	48.3082
1.866	51.9789	43.7642	2.184	56.607	45.6227
1.886	48.6867	41.2056	2.208	52.9448	42.8924
1.907	45.3055	38.6185	2.232	49.1463	40.1217
1.927	41.8446	36.0062	2.256	45.2246	37.3152
1.948	38.3139	33.3721	2.28	41.1939	34.4775
1.968	34.7238	30.7198	2.304	37.0702	31.6138
1.988	31.0856	28.0527	2.328	32.8705	28.7289
2.009	27.4109	25.3747	2.352	28.6129	25.8282
2.03	23.7116	22.6892	2.376	24.3163	22.9168
2.05	20	20	2.4	20	20

## Sheet: DFS16-opx2
Table DR6. The measured water content profile for DFS opx and their 1D or 3D modeling results.
3D modeling						Measured profiles
C-D profile	3D modeling		L-R profile	3D modeling		L-R profile	Measured	error (5%)	C-D profile	Measured	error (5%)
Distance(mm)	0.1yr	0.5yr	Distance(mm)	0.2yr	0.5yr	Distance(mm)			Distance(mm)
0	20	20	0	20	20	0	33	1.65	0.3	75.801	3.79005
0.015	23.0654	22.0209	0.038	25.4888	23.4801	0.075	38	1.9	0.39	82.0973	4.10486
0.03	26.12	24.0397	0.077	30.9144	26.944	0.15	47	2.35	0.48	86.4993	4.32496
0.045	29.1528	26.0544	0.115	36.2157	30.376	0.225	50	2.5	0.57	88.8153	4.44077
0.06	32.1534	28.063	0.153	41.3359	33.7605	0.3	55	2.75	0.66	80.3871	4.01935
0.075	35.1114	30.0633	0.191	46.2242	37.0829	0.375	62	3.1	0.75	92.1054	4.60527
0.09	38.0172	32.0535	0.229	50.8373	40.3291	0.45	64	3.2	0.84	94.8509	4.74254
0.105	40.8614	34.0313	0.268	55.1406	43.4862	0.525	68	3.4	0.93	92.8339	4.6417
0.12	43.6356	35.995	0.306	59.1087	46.5425	0.6	72	3.6	1.02	77.3424	3.86712
0.135	46.3317	37.9423	0.344	62.7254	49.4875	0.675	74	3.7	1.11	61.4291	3.07146
0.15	48.9426	39.8715	0.383	65.984	52.312	0.75	77	3.85	1.2	70.7317	3.53659
0.165	51.4621	41.7805	0.421	68.8861	55.0086	0.825	79	3.95	1.29	70.0645	3.50323
0.18	53.8846	43.6675	0.459	71.4409	57.5711	0.9	83	4.15	1.38	54.1895	2.70948
0.195	56.2057	45.5305	0.497	73.664	59.9948	0.975	81	4.05	1.47	38.5984	1.92992
0.21	58.4216	47.3676	0.536	75.5762	62.2768	1.05	81	4.05	1.5
0.225	60.5296	49.1771	0.574	77.2022	64.4153	1.125	83	4.15
0.24	62.5277	50.9572	0.612	78.5687	66.4101	1.2	82	4.1
0.255	64.4151	52.706	0.65	79.7039	68.2622	1.275	87	4.35
0.27	66.1914	54.4219	0.688	80.6362	69.974	1.35	85	4.25
0.285	67.8573	56.1032	0.727	81.393	71.5486	1.425	80	4
0.3	69.414	57.7482	0.765	82.0002	72.9904	1.5	86	4.3
0.315	70.8635	59.3553	0.803	82.4818	74.3045	1.575	83	4.15
0.33	72.2084	60.923	0.842	82.8594	75.4967	1.65	88	4.4
0.345	73.4519	62.4496	0.88	83.1521	76.5732	1.725	94	4.7
0.36	74.5973	63.9339	0.918	83.3762	77.5409	1.8	88	4.4
0.375	75.6488	65.3743	0.956	83.546	78.4065	1.875	85	4.25
0.39	76.6106	66.7694	0.994	83.673	79.1775	1.95	85	4.25
0.405	77.4871	68.1179	1.033	83.767	79.8608	2.025	86	4.3
0.42	78.283	69.4186	1.071	83.8358	80.4637	2.1	89	4.45
0.435	79.0033	70.6702	1.109	83.8855	80.9932	2.175	95	4.75
0.45	79.6526	71.8715	1.148	83.921	81.4561	2.25	82	4.1
0.465	80.2359	73.0214	1.186	83.9461	81.8588	2.325	79	3.95
0.48	80.7579	74.1189	1.224	83.9636	82.2075	2.4	84	4.2
0.495	81.2233	75.1628	1.262	83.9757	82.5082	2.475
0.51	81.6368	76.1523	1.301	83.984	82.7661
0.525	82.0025	77.0864	1.339	83.9895	82.9863
0.54	82.3248	77.9643	1.377	83.9932	83.1735
0.555	82.6076	78.7852	1.415	83.9957	83.3318
0.57	82.8546	79.5482	1.454	83.9973	83.4649
0.585	83.0691	80.2528	1.492	83.9983	83.5764
0.6	83.2545	80.8983	1.53	83.9989	83.6691
0.615	83.4136	81.484	1.568	83.9994	83.7458
0.63	83.5489	82.0096	1.607	83.9996	83.8088
0.645	83.6629	82.4744	1.645	83.9998	83.8599
0.66	83.7576	82.878	1.683	83.9999	83.9011
0.675	83.8347	83.2202	1.721	83.9999	83.9336
0.69	83.8958	83.5006	1.76	84	83.9587
0.705	83.9421	83.7189	1.798	84	83.9773
0.72	83.9745	83.875	1.836	84	83.9901
0.735	83.9937	83.9688	1.874	84	83.9975
0.75	84	84	1.913	84	84
0.765	83.9937	83.9688	1.951	84	83.9975
0.78	83.9745	83.875	1.989	84	83.9901
0.795	83.9421	83.7189	2.027	84	83.9773
0.81	83.8958	83.5006	2.066	84	83.9587
0.825	83.8347	83.2202	2.104	83.9999	83.9336
0.84	83.7576	82.878	2.142	83.9999	83.9011
0.855	83.6629	82.4744	2.18	83.9998	83.8599
0.87	83.5489	82.0096	2.219	83.9996	83.8088
0.885	83.4136	81.484	2.257	83.9994	83.7458
0.9	83.2545	80.8983	2.295	83.9989	83.6691
0.915	83.0691	80.2528	2.333	83.9983	83.5764
0.93	82.8546	79.5482	2.371	83.9973	83.4649
0.945	82.6076	78.7852	2.41	83.9957	83.3318
0.96	82.3248	77.9643	2.448	83.9932	83.1735
0.975	82.0025	77.0864	2.486	83.9895	82.9863
0.99	81.6368	76.1523	2.525	83.984	82.7661
1.005	81.2233	75.1628	2.563	83.9757	82.5082
1.02	80.7579	74.1189	2.601	83.9636	82.2075
1.035	80.2359	73.0214	2.639	83.9461	81.8588
1.05	79.6526	71.8715	2.678	83.921	81.4561
1.065	79.0033	70.6702	2.716	83.8855	80.9932
1.08	78.283	69.4186	2.754	83.8358	80.4637
1.095	77.4871	68.1179	2.792	83.767	79.8608
1.11	76.6106	66.7694	2.831	83.673	79.1775
1.125	75.6488	65.3743	2.869	83.546	78.4065
1.14	74.5973	63.9339	2.907	83.3762	77.5409
1.155	73.4519	62.4496	2.945	83.1521	76.5732
1.17	72.2084	60.923	2.984	82.8594	75.4967
1.185	70.8635	59.3553	3.022	82.4818	74.3045
1.2	69.414	57.7482	3.06	82.0002	72.9904
1.215	67.8573	56.1032	3.098	81.393	71.5486
1.23	66.1914	54.4219	3.137	80.6362	69.974
1.245	64.4151	52.706	3.175	79.7039	68.2622
1.26	62.5277	50.9572	3.213	78.5687	66.4101
1.275	60.5296	49.1771	3.251	77.2022	64.4153
1.29	58.4216	47.3676	3.29	75.5762	62.2768
1.305	56.2057	45.5305	3.328	73.664	59.9948
1.32	53.8846	43.6675	3.366	71.4409	57.5711
1.335	51.4621	41.7805	3.404	68.8861	55.0086
1.35	48.9426	39.8715	3.443	65.984	52.312
1.365	46.3317	37.9423	3.481	62.7254	49.4875
1.38	43.6356	35.995	3.519	59.1087	46.5425
1.395	40.8614	34.0313	3.557	55.1406	43.4862
1.41	38.0172	32.0535	3.596	50.8373	40.3291
1.425	35.1114	30.0633	3.634	46.2242	37.0829
1.44	32.1534	28.063	3.672	41.3359	33.7605
1.455	29.1528	26.0544	3.71	36.2157	30.376
1.47	26.12	24.0397	3.749	30.9144	26.944
1.485	23.0654	22.0209	3.787	25.4888	23.4801
1.5	20	20	3.825	20	20

## Sheet: DFS14-opx11
Table DR6. The measured water content profile for DFS opx and their 1D or 3D modeling results.
Distance (mm)	Measured water (ppm)	Cwater error (5%)	1D t=0.2yr	1D t=0.1yr	Distance (mm)	3D t=0.10yr	3D t=0.2yr
0			20	20	0	20	20
0.05			32.9868	38.3058	0.023	28.4762	26.9274
0.1	61.757	3.08785	45.7192	55.9025	0.046	36.8815	33.8161
0.15	69.9646	3.49823	57.9575	72.1623	0.069	45.1467	40.628
0.2	78.3546	3.91773	69.4906	86.6048	0.092	53.2061	47.3264
0.25	86.6084	4.33042	80.1461	98.9363	0.115	60.9991	53.8763
0.3	93.6081	4.68041	89.7979	109.057	0.138	68.4713	60.2451
0.35	100.355	5.01773	98.3693	117.042	0.161	75.5761	66.4034
0.4	105.939	5.29697	105.832	123.098	0.184	82.275	72.3248
0.45	112.975	5.64873	112.202	127.513	0.207	88.5383	77.9866
0.5	118.694	5.93468	117.533	130.607	0.23	94.3454	83.3698
0.55	120.946	6.0473	121.907	132.691	0.253	99.6843	88.4597
0.6	124.232	6.21161	125.426	134.041	0.276	104.552	93.2453
0.65	129.141	6.45703	128.201	134.881	0.299	108.952	97.7196
0.7	134.214	6.71072	130.346	135.383	0.322	112.897	101.88
0.75	133.192	6.65962	131.972	135.673	0.345	116.404	105.726
0.8	134.547	6.72736	133.179	135.832	0.368	119.496	109.262
0.85	133.846	6.69231	134.058	135.917	0.391	122.199	112.494
0.9	134.698	6.73488	134.683	135.961	0.414	124.542	115.433
0.95	134.425	6.72124	135.116	135.982	0.437	126.556	118.09
1	135.647	6.78233	135.406	135.992	0.46	128.273	120.479
1.05	136.009	6.80047	135.589	135.997	0.483	129.724	122.614
1.1	134.302	6.71512	135.689	135.998	0.506	130.94	124.512
1.15	133.177	6.65887	135.721	135.999	0.529	131.951	126.19
1.2	133.97	6.69848	135.689	135.998	0.552	132.784	127.665
1.25	136.926	6.84631	135.589	135.997	0.575	133.466	128.955
1.3	137.794	6.88969	135.406	135.992	0.598	134.018	130.076
1.35	136.976	6.84878	135.116	135.982	0.621	134.461	131.044
1.4	134.674	6.7337	134.683	135.961	0.644	134.815	131.877
1.45	132.634	6.6317	134.058	135.917	0.667	135.094	132.589
1.5	136.599	6.82994	133.179	135.832	0.69	135.313	133.194
1.55	128.064	6.40319	131.972	135.673	0.713	135.483	133.706
1.6	127.529	6.37646	130.346	135.383	0.736	135.615	134.136
1.65	122.849	6.14247	128.201	134.881	0.759	135.715	134.495
1.7	127.174	6.35869	125.426	134.041	0.782	135.791	134.793
1.75	108.931	5.44657	121.907	132.691	0.805	135.848	135.04
1.8			117.533	130.607	0.828	135.89	135.243
1.85			112.202	127.513	0.851	135.922	135.409
1.9			105.832	123.098	0.874	135.945	135.543
1.95	97.8757	4.89378	98.3693	117.042	0.897	135.962	135.652
2	92.3306	4.61653	89.7979	109.057	0.92	135.974	135.739
2.05			80.1461	98.9363	0.943	135.982	135.809
2.1	89.6015	4.48008	69.4906	86.6048	0.966	135.988	135.864
2.15	81.044	4.0522	57.9575	72.1623	0.989	135.993	135.907
2.2	70.6624	3.53312	45.7192	55.9025	1.01	135.996	135.941
2.25	56.4663	2.82332	32.9868	38.3058	1.03	135.998	135.967
2.3			20	20	1.06	135.999	135.986
					1.08	136	136
					1.1	136.001	136.009
					1.13	136.001	136.015
					1.15	136.001	136.017
					1.17	136.001	136.015
					1.2	136.001	136.009
					1.22	136	136
					1.24	135.999	135.986
					1.27	135.998	135.967
					1.29	135.996	135.941
					1.31	135.993	135.907
					1.33	135.988	135.864
					1.36	135.982	135.809
					1.38	135.974	135.739
					1.4	135.962	135.652
					1.43	135.945	135.543
					1.45	135.922	135.409
					1.47	135.89	135.243
					1.5	135.848	135.04
					1.52	135.791	134.793
					1.54	135.715	134.495
					1.56	135.615	134.136
					1.59	135.483	133.706
					1.61	135.313	133.194
					1.63	135.094	132.589
					1.66	134.815	131.877
					1.68	134.461	131.044
					1.7	134.018	130.076
					1.73	133.466	128.955
					1.75	132.784	127.665
					1.77	131.951	126.19
					1.79	130.94	124.512
					1.82	129.724	122.614
					1.84	128.273	120.479
					1.86	126.556	118.09
					1.89	124.542	115.433
					1.91	122.199	112.494
					1.93	119.496	109.262
					1.96	116.404	105.726
					1.98	112.897	101.88
					2	108.952	97.7196
					2.02	104.552	93.2453
					2.05	99.6843	88.4597
					2.07	94.3454	83.3698
					2.09	88.5383	77.9866
					2.12	82.275	72.3248
					2.14	75.5761	66.4034
					2.16	68.4713	60.2451
					2.18	60.9991	53.8763
					2.21	53.2061	47.3264
					2.23	45.1467	40.628
					2.25	36.8815	33.8161
					2.28	28.4762	26.9274
					2.3	20	20
					3D modeling parameters
					a=2.3*0.5e-3/2 m;
					b=2.3*0.5e-3/2 m;
					c=2.3e-3/2 m;
					Dx=Dy=Dz=1e-14m2/s;
					C0=136;
					C1=20;

## Sheet: DFS11-opx5
Table DR6. The measured water content profile for DFS opx and their 1D or 3D modeling results.
Distance (mm)	Measured	1D t=0.35yr	Distance (mm)	3D Modeling
				t=0.1yr	t=0.3yr	t=0.35yr	t=0.4yr
0		20	0	20	20	20	20
0.075	50	34.8372	0.036	34.2673	28.2617	27.6576	27.1755
0.15	62.5701	49.3478	0.072	48.2441	36.4668	35.2703	34.3142
0.225	70.4576	63.2268	0.108	61.6575	44.5601	42.7939	41.3797
0.3		76.2094	0.144	74.2683	52.4884	50.1859	48.3369
0.375	82.4616	88.0862	0.18	85.8831	60.202	57.4059	55.1523
0.45	92.9854	98.7124	0.216	96.3627	67.6554	64.4166	61.7945
0.525	105.757	108.01	0.252	105.626	74.808	71.1841	68.2346
0.6	112.564	115.967	0.288	113.646	81.6251	77.6785	74.4468
0.675	117.555	122.626	0.324	120.45	88.0779	83.8743	80.4082
0.75	126.642	128.076	0.36	126.104	94.1441	89.7505	86.0997
0.825	127.561	132.439	0.396	130.707	99.8079	95.291	91.5056
0.9	128.609	135.855	0.432	134.378	105.06	100.484	96.6138
0.975		138.47	0.468	137.246	109.896	105.323	101.416
1.05	135	140.428	0.504	139.441	114.32	109.806	105.907
1.125		141.862	0.54	141.086	118.339	113.934	110.086
1.2		142.889	0.576	142.295	121.964	117.714	113.954
1.275	140	143.608	0.612	143.165	125.212	121.154	117.517
1.35	145.95	144.1	0.648	143.778	128.102	124.266	120.78
1.425	143.292	144.429	0.684	144.202	130.657	127.066	123.755
1.5	142.244	144.643	0.72	144.488	132.899	129.57	126.453
1.575	144.654	144.779	0.756	144.678	134.854	131.795	128.887
1.65	148.889	144.86	0.792	144.801	136.546	133.762	131.071
1.725	148.349	144.902	0.828	144.88	138.001	135.49	133.021
1.8	141.877	144.915	0.864	144.929	139.243	137	134.754
1.875	145.237	144.902	0.9	144.958	140.297	138.31	136.285
1.95	146.566	144.86	0.936	144.976	141.185	139.442	137.631
2.025	147.355	144.779	0.972	144.987	141.927	140.413	138.809
2.1	145.572	144.643	1.008	144.993	142.544	141.241	139.833
2.175	138.743	144.429	1.044	144.996	143.053	141.943	140.721
2.25	140.948	144.1	1.08	144.998	143.47	142.535	141.485
2.325	140.613	143.608	1.116	144.999	143.81	143.032	142.139
2.4	139.089	142.889	1.152	144.999	144.084	143.445	142.697
2.475	137.479	141.862	1.188	145	144.304	143.788	143.171
2.55	133.73	140.428	1.224	145	144.48	144.07	143.57
2.625	141.196	138.47	1.26	145	144.619	144.301	143.905
2.7	133.708	135.855	1.296	145	144.729	144.489	144.185
2.775	130.121	132.439	1.332	145	144.814	144.641	144.417
2.85	129.246	128.076	1.368	145	144.88	144.763	144.609
2.925	130.024	122.626	1.404	145	144.931	144.861	144.767
3	127.496	115.967	1.44	145	144.97	144.939	144.896
3.075	104.871	108.01	1.476	145	145	145	145
3.15		98.7124	1.512	145	145.022	145.048	145.084
3.225		88.0862	1.548	145	145.039	145.085	145.151
3.3		76.2094	1.584	145	145.051	145.114	145.204
3.375		63.2268	1.62	145	145.06	145.136	145.246
3.45		49.3478	1.656	145	145.067	145.152	145.277
3.525		34.8372	1.692	145	145.071	145.163	145.3
3.6		20	1.728	145	145.074	145.171	145.316
			1.764	145	145.076	145.175	145.325
			1.8	145	145.077	145.177	145.328
			1.836	145	145.076	145.175	145.325
			1.872	145	145.074	145.171	145.316
			1.908	145	145.071	145.163	145.3
			1.944	145	145.067	145.152	145.277
			1.98	145	145.06	145.136	145.246
			2.016	145	145.051	145.114	145.204
			2.052	145	145.039	145.085	145.151
			2.088	145	145.022	145.048	145.084
			2.124	145	145	145	145
			2.16	145	144.97	144.939	144.896
			2.196	145	144.931	144.861	144.767
			2.232	145	144.88	144.763	144.609
			2.268	145	144.814	144.641	144.417
			2.304	145	144.729	144.489	144.185
			2.34	145	144.619	144.301	143.905
			2.376	145	144.48	144.07	143.57
			2.412	145	144.304	143.788	143.171
			2.448	144.999	144.084	143.445	142.697
			2.484	144.999	143.81	143.032	142.139
			2.52	144.998	143.47	142.535	141.485
			2.556	144.996	143.053	141.943	140.721
			2.592	144.993	142.544	141.241	139.833
			2.628	144.987	141.927	140.413	138.809
			2.664	144.976	141.185	139.442	137.631
			2.7	144.958	140.297	138.31	136.285
			2.736	144.929	139.243	137	134.754
			2.772	144.88	138.001	135.49	133.021
			2.808	144.801	136.546	133.762	131.071
			2.844	144.678	134.854	131.795	128.887
			2.88	144.488	132.899	129.57	126.453
			2.916	144.202	130.657	127.066	123.755
			2.952	143.778	128.102	124.266	120.78
			2.988	143.165	125.212	121.154	117.517
			3.024	142.295	121.964	117.714	113.954
			3.06	141.086	118.339	113.934	110.086
			3.096	139.441	114.32	109.806	105.907
			3.132	137.246	109.896	105.323	101.416
			3.168	134.378	105.06	100.484	96.6138
			3.204	130.707	99.8079	95.291	91.5056
			3.24	126.104	94.1441	89.7505	86.0997
			3.276	120.45	88.0779	83.8743	80.4082
			3.312	113.646	81.6251	77.6785	74.4468
			3.348	105.626	74.808	71.1841	68.2346
			3.384	96.3627	67.6554	64.4166	61.7945
			3.42	85.8831	60.202	57.4059	55.1523
			3.456	74.2683	52.4884	50.1859	48.3369
			3.492	61.6575	44.5601	42.7939	41.3797
			3.528	48.2441	36.4668	35.2703	34.3142
			3.564	34.2673	28.2617	27.6576	27.1755
			3.6	20	20	20	20
			3D modeling parameters
			a=2.73*0.5e-3/2 m;
			b=2.73*0.5e-3/2 m;
			c=3.23e-3/2 m;
			Dx=Dy=Dz=1e-14m2/s;
			C0=145;
			C1=20;
